# Supplementary material for: A method for the statistical evaluation of the fluorescence intensity of single blinking quantum dots using a confocal fluorescence microscope
Source: Royal Society of Chemistry journal article supplement (doi:10.1039/d0an00010h), 2020-01-01
Supplement: d0an00010h3.pdf [file d0an00010h3.pdf]

## Supporting Information

# **A method for statistical evaluation of the fluorescence intensity of single blinking quantum dots under confocal fluorescence microscope**

Zheng-Yuan Hong<sup>†, \*</sup>, Shu-Lin Liu<sup>‡</sup>, Dai-Wen Pang<sup>‡</sup>

<sup>†</sup>PET-CT/MRI Center, Molecular Imaging Center, Renmin Hospital of Wuhan University, Wuhan, 430060, People's Republic of China

<sup>‡</sup>State Key Laboratory of Medicinal Chemical Biology, Tianjin Key Laboratory of Biosensing and Molecular Recognition, Research Centre for Analytical Sciences, College of Chemistry, Nankai University, Tianjin 300071, P. R. China.

\* Address correspondence to [hongzhengyuan@whu.edu.cn](mailto:hongzhengyuan@whu.edu.cn)

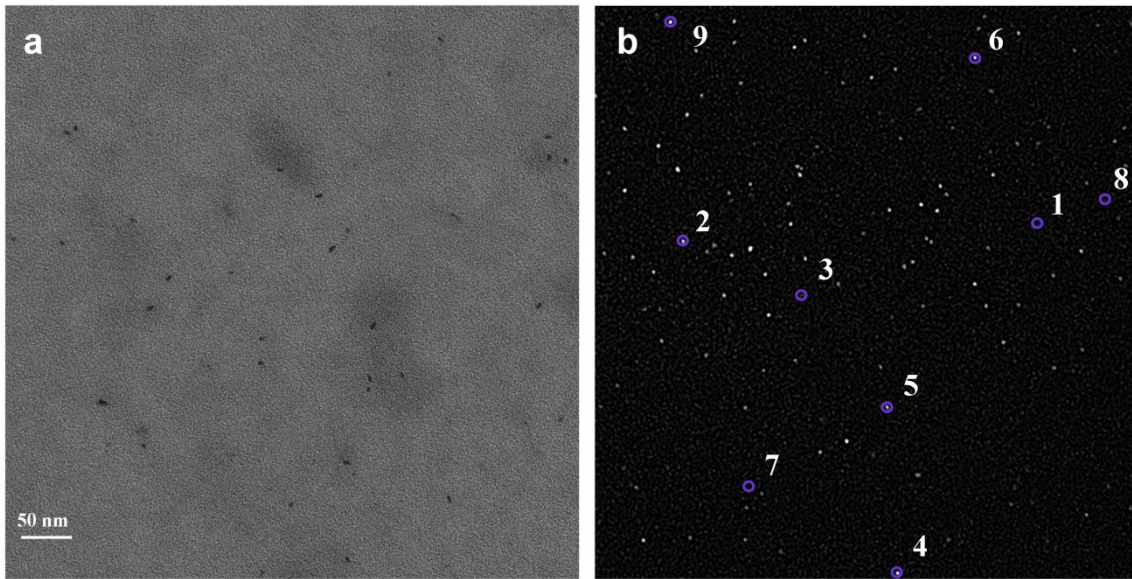

Figure S1 a) TEM image of 1 nM QDs. Scale bar represents 50 nm. b) A random frame of Movie S1, the circles are ROI, which are random selected.

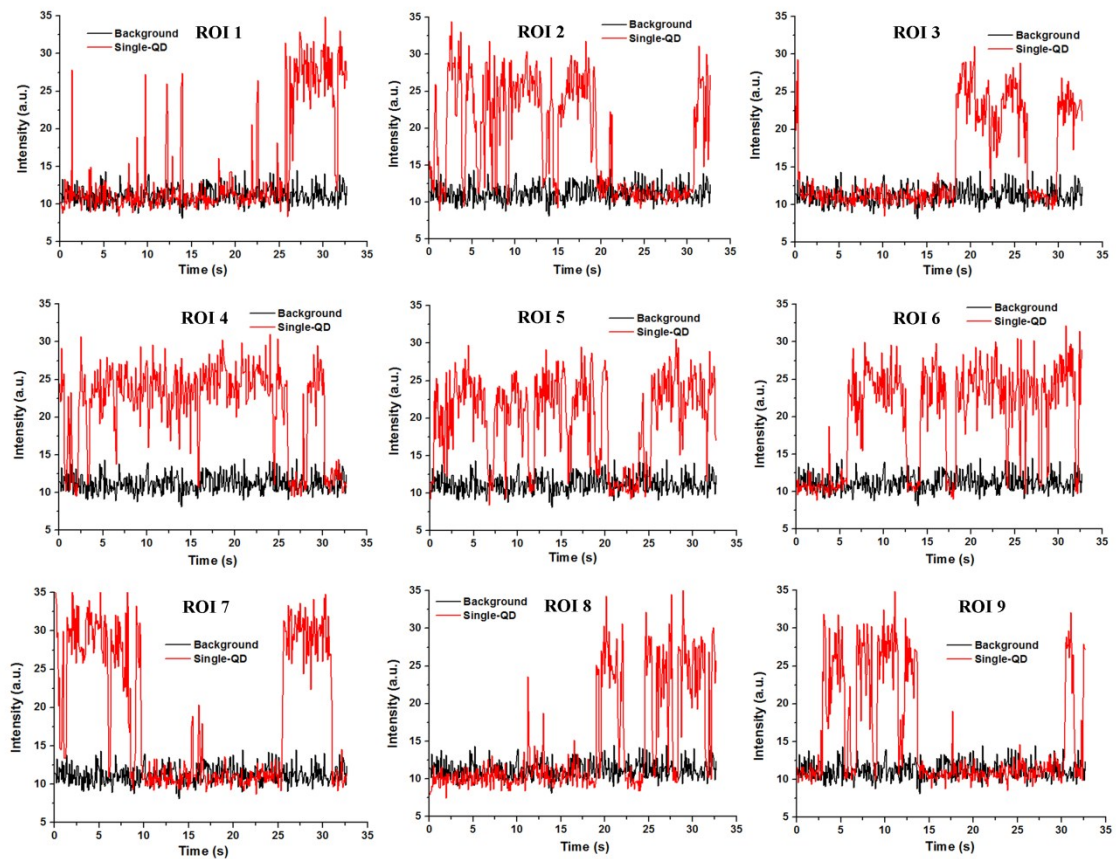

Figure S2 Intensity *versus* time plots of the QD spots in the 9 ROI marked in Figure S1b.

Movie S1

Movie S2
